# Supplementary material for: Comparison of long-term immunogenicity and safety of human papillomavirus (HPV)-16/18 AS04-adjuvanted vaccine and HPV-6/11/16/18 vaccine in healthy women aged 18-45 years: End-of-study analysis of a Phase III randomized trial
Source: PubMed Central journal article supplement — Hum Vaccin Immunother. 2014 Nov 1;10(12):3435–45. doi: 10.4161/hv.36121 (PMC4514070; doi:10.4161/hv.36121), 2014-11-01
Supplement: khvi-10-12-975078-s001.pdf [file khvi-10-12-975078-s001.pdf]

## Supplementary data

**Table 1** Seropositivity rates and GMTs for serum anti-HPV-16 and anti-HPV-18 type-specific antibodies measured by ELISA at Month 60 in ATP and TVC cohorts.

| ATP cohort for immunogenicity, seronegative and DNA-negative prior to vaccination |         |                   |                 |                  |                        |                   |                   |
|-----------------------------------------------------------------------------------|---------|-------------------|-----------------|------------------|------------------------|-------------------|-------------------|
| Age                                                                               | Antigen | HPV-16/18 vaccine |                 |                  | HPV-6/11/16/18 vaccine |                   |                   |
|                                                                                   |         | N                 | % SP [95% CI]   | GMT [95% CI]     | N                      | % SP [95% CI]     | GMT [95% CI]      |
| <b>18–26 y</b>                                                                    |         |                   |                 |                  |                        |                   |                   |
|                                                                                   | HPV-16  | 31                | 100 [88.8, 100] | 1197 [830, 1725] | 35                     | 100 [90.0, 100]   | 232 [154, 350]    |
|                                                                                   | HPV-18  | 31                | 100 [88.8, 100] | 452 [282, 725]   | 40                     | 95.0 [83.1, 99.4] | 49.6 [33.0, 74.6] |
| <b>27–35 y</b>                                                                    |         |                   |                 |                  |                        |                   |                   |
|                                                                                   | HPV-16  | 28                | 100 [87.7, 100] | 603 [428, 849]   | 20                     | 100 [83.2, 100]   | 156 [100, 242]    |
|                                                                                   | HPV-18  | 39                | 100 [91.0, 100] | 232 [184, 293]   | 26                     | 88.5 [69.8, 97.6] | 30.9 [19.0, 50.3] |
| <b>36–45 y</b>                                                                    |         |                   |                 |                  |                        |                   |                   |
|                                                                                   | HPV-16  | 31                | 100 [88.8, 100] | 430 [300, 617]   | 31                     | 100 [88.8, 100]   | 199 [146, 272]    |
|                                                                                   | HPV-18  | 39                | 100 [91.0, 100] | 242 [170, 345]   | 43                     | 95.3 [84.2, 99.4] | 41.0 [30.5, 55.0] |
| TVC, irrespective of serostatus and DNA status prior to vaccination               |         |                   |                 |                  |                        |                   |                   |
| Age                                                                               | Antigen | HPV-16/18 vaccine |                 |                  | HPV-6/11/16/18 vaccine |                   |                   |
|                                                                                   |         | N                 | % SP [95% CI]   | GMT [95% CI]     | N                      | % SP [95% CI]     | GMT [95% CI]      |
| <b>18–26 y</b>                                                                    |         |                   |                 |                  |                        |                   |                   |
|                                                                                   | HPV-16  | 62                | 100 [94.2, 100] | 1143 [886, 1473] | 65                     | 100 [94.5, 100]   | 324 [239, 438]    |
|                                                                                   | HPV-18  | 62                | 100 [94.2, 100] | 423 [314, 571]   | 65                     | 96.9 [89.3, 99.6] | 52.8 [38.7, 71.9] |
| <b>27–35 y</b>                                                                    |         |                   |                 |                  |                        |                   |                   |
|                                                                                   | HPV-16  | 76                | 100 [95.3, 100] | 840 [675, 1045]  | 60                     | 100 [94.0, 100]   | 313 [230, 427]    |

|                |               |    |                 |                 |    |                   |                   |
|----------------|---------------|----|-----------------|-----------------|----|-------------------|-------------------|
|                | <b>HPV-18</b> | 76 | 100 [95.3, 100] | 326 [262, 405]  | 60 | 95.0 [86.1, 99.0] | 56.6 [39.2, 81.9] |
| <b>36–45 y</b> |               |    |                 |                 |    |                   |                   |
|                | <b>HPV-16</b> | 75 | 100 [95.2, 100] | 837 [613, 1142] | 82 | 100 [95.6, 100]   | 448 [332, 605]    |
|                | <b>HPV-18</b> | 75 | 100 [95.2, 100] | 292 [222, 385]  | 82 | 97.6 [91.5, 99.7] | 75.6 [55.5, 103]  |

95% CI, exact 95% confidence interval; GMT, geometric mean titer; N, number of subjects with available results; ELISA, enzyme-linked immunosorbent assay; ATP, according-to-protocol; TVC, total vaccinated cohort; SP, seropositivity (defined as IgG antibody titer  $\geq 8$  ELISA units/mL for HPV-16 and  $\geq 7$  ELISA units/mL for HPV-18; y, year.
